# Supplementary material for: Cellular State Transformations Using Deep Learning for Precision Medicine Applications
Source: PubMed Central journal article supplement (PMC7660411; doi:10.1016/j.patter.2020.100087), 2020-08-17
Supplement: mmc1.pdf [file mmc1.pdf]

**PATTER, Volume 1**

**Supplemental Information**

**Cellular State Transformations Using Deep  
Learning for Precision Medicine Applications**

**Colin Targonski, M. Reed Bender, Benjamin T. Shealy, Benafsh Husain, Bill  
Paseman, Melissa C. Smith, and F. Alex Feltus**

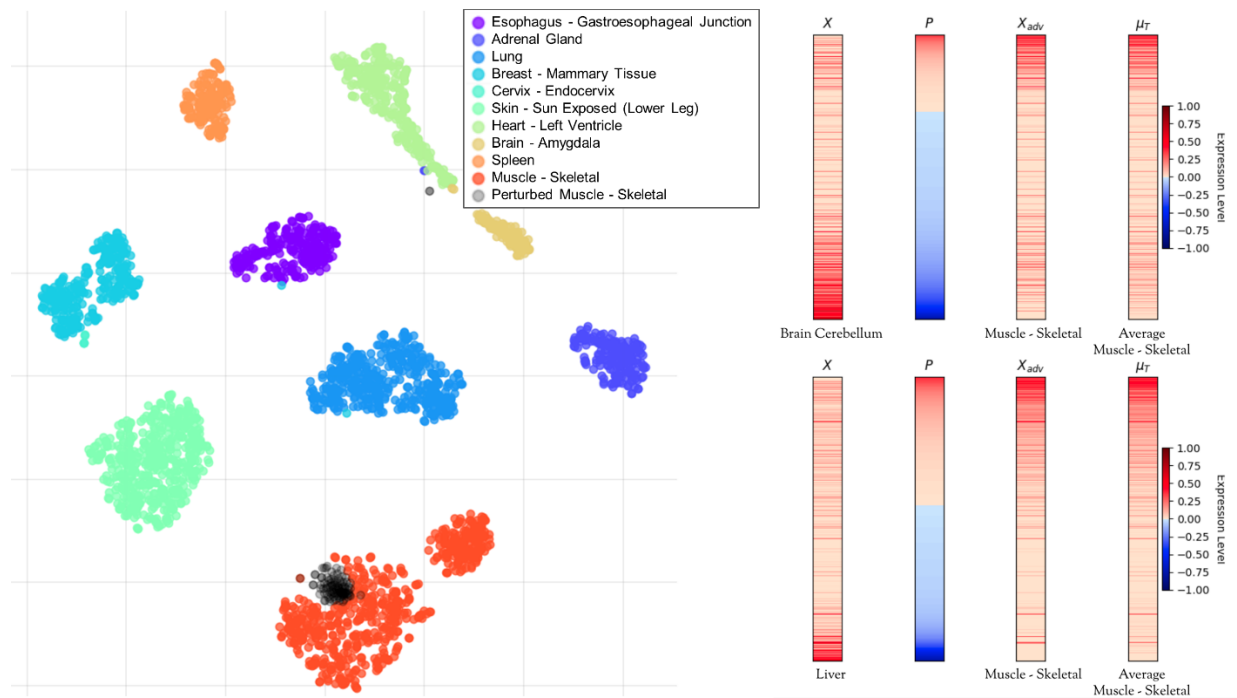

**Supplemental Figure S1. Adversarial Generation for Muscle-Skeletal Target Using all Hallmark Genes as the Input Gene Set.** t-SNE plot of original and perturbed samples using the all Hallmark genes (left). Heatmap of cellular transformations from Brain-Cerebellum and Liver to Muscle-Skeletal (right). Perturbations ( $P$ ) range from  $[-1, 1]$ , which is added to original sample ( $x$ ), then adversarial sample ( $x_{adv}$ ) is clipped to  $[0, 1]$ . The mean expression vector ( $\mu_T$ ) of the target class (Muscle-Skeletal) is shown.

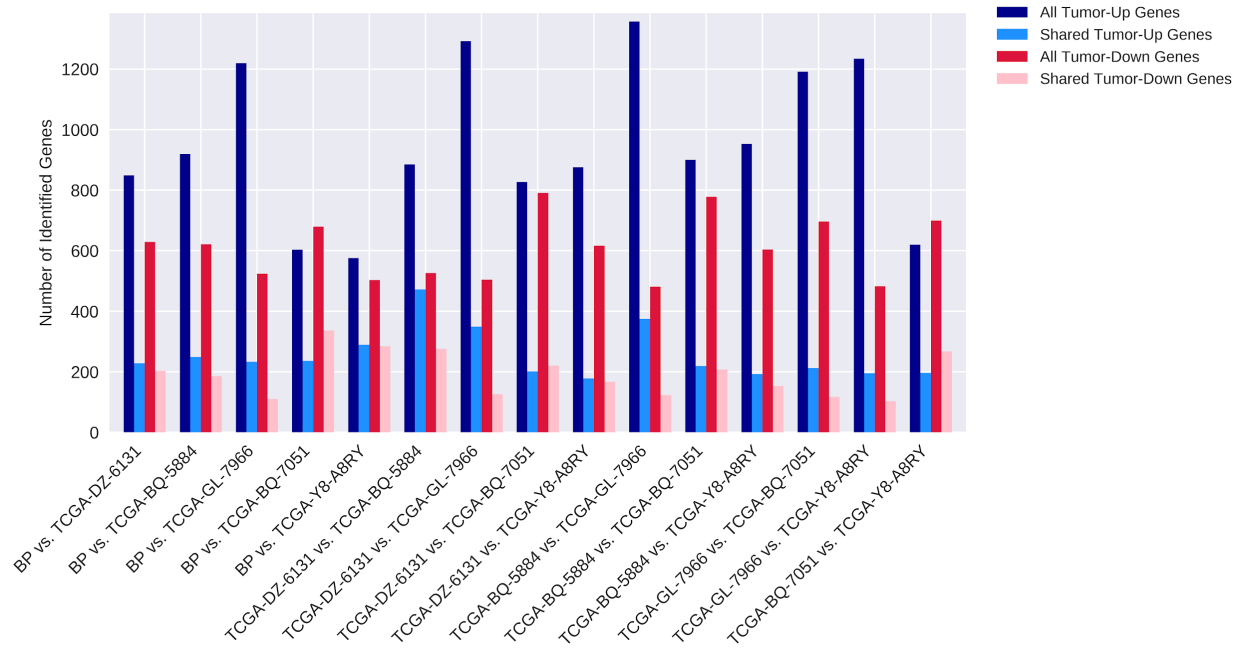

**Supplemental Figure S2. Uniquely Perturbed Genes in Kidney Tumors.**

Comparison of TSPG results between patients shows a pattern of more unique *tumor-upregulated* genes being identified than *tumor-downregulated* genes.
